# Supplementary material for: Integrated Phytochemical Analysis Based on UPLC-MS and Network Pharmacology Approaches to Explore the Quality Control Markers for the Quality Assessment of Trifolium pratense L
Source: PubMed Central journal article supplement (PMC7504318; doi:10.3390/molecules25173787), 2020-08-20
Supplement: molecules-25-03787-s001.pdf [file molecules-25-03787-s001.pdf]

## Supplementary Materials

### 1 Metabolomics profiling analysis of red clover

**Table S1.** Compound identification of red clover in positive and negative ion modes.

| No | RT<br>min | Ion<br>Form             | Ion<br>Formula                                  | MS <sup>1</sup>     |                  |            | MS <sup>2</sup>                                                                                                                                                                      | MS <sup>3</sup>                                                                                                                                                                                                                                                                                                              | Identification                  | Ste<br>m | Le<br>af | Flow<br>er |
|----|-----------|-------------------------|-------------------------------------------------|---------------------|------------------|------------|--------------------------------------------------------------------------------------------------------------------------------------------------------------------------------------|------------------------------------------------------------------------------------------------------------------------------------------------------------------------------------------------------------------------------------------------------------------------------------------------------------------------------|---------------------------------|----------|----------|------------|
|    |           |                         |                                                 | Measur<br>ed<br>m/z | Predicted<br>m/z | Err<br>ppm |                                                                                                                                                                                      |                                                                                                                                                                                                                                                                                                                              |                                 |          |          |            |
| 1  | 1.43      | [M -<br>H] <sup>-</sup> | C <sub>6</sub> H <sub>11</sub> O <sub>7</sub>   | 195.050<br>5        | 195.0499         | 2.82       |                                                                                                                                                                                      |                                                                                                                                                                                                                                                                                                                              | Gluconic acid                   | ++       | ++       | +++        |
| 2  | 4.46      | [M -<br>H] <sup>-</sup> | C <sub>13</sub> H <sub>11</sub> O <sub>8</sub>  | 295.045<br>0        | 295.0448<br>4    | 0.67       | <b>179.03506(C<sub>9</sub>H<sub>7</sub>O<sub>4</sub>);</b><br>133.01451(C <sub>4</sub> H <sub>5</sub> O <sub>5</sub> );<br>115.00400(C <sub>4</sub> H <sub>3</sub> O <sub>4</sub> ); | [295-179]135.04524(C <sub>8</sub> H <sub>7</sub> O <sub>2</sub> );                                                                                                                                                                                                                                                           | Benzoylcitronensa<br>ure        | ++       | ++<br>+  | +++        |
| 3  | 5.42      | [M +<br>H] <sup>+</sup> | C <sub>16</sub> H <sub>19</sub> O <sub>9</sub>  | 355.102<br>8        | 355.1024         | 1.21       |                                                                                                                                                                                      |                                                                                                                                                                                                                                                                                                                              | chlorogenic acid                | +        | ++<br>+  | +++        |
| 4  | 6.60      | [M +<br>H] <sup>+</sup> | C <sub>21</sub> H <sub>21</sub> O <sub>10</sub> | 433.111<br>4        | 433.1129         | -3.54      | 271.06067(C <sub>15</sub> H <sub>11</sub> O <sub>5</sub> );                                                                                                                          | [433-271]253.04956(C <sub>15</sub> H <sub>9</sub> O <sub>4</sub> );<br>243.06529(C <sub>14</sub> H <sub>11</sub> O <sub>4</sub> );<br>215.07042(C <sub>13</sub> H <sub>11</sub> O <sub>3</sub> );<br><b>153.01839(C<sub>7</sub>H<sub>5</sub>O<sub>4</sub>);</b><br>149.02335(C <sub>8</sub> H <sub>5</sub> O <sub>3</sub> ); | Genistein-<br>glucoside         | +++      | ++<br>+  | +++        |
| 5  | 6.71      | [M +<br>H] <sup>+</sup> | C <sub>21</sub> H <sub>21</sub> O <sub>9</sub>  | 417.117<br>0        | 417.1180         | -2.34      | 239.07021(C <sub>15</sub> H <sub>11</sub> O <sub>3</sub> )                                                                                                                           |                                                                                                                                                                                                                                                                                                                              | daidzin                         | +        | ++       | +++        |
| 6  | 7.20      | [M +<br>H] <sup>+</sup> | C <sub>22</sub> H <sub>23</sub> O <sub>10</sub> | 447.127<br>7        | 447.1286         | -1.91      | 269.08072(C <sub>16</sub> H <sub>13</sub> O <sub>4</sub> )                                                                                                                           |                                                                                                                                                                                                                                                                                                                              | calycosin-7-O-β-D-<br>glucoside | +++      | ++<br>+  | +++        |

|    |           |                      |                                                 |               |          |       |                                                                                                                                                                                          |                                                                                                                                                                                                                                                                                                                                                                                            |                                              |     |         |     |
|----|-----------|----------------------|-------------------------------------------------|---------------|----------|-------|------------------------------------------------------------------------------------------------------------------------------------------------------------------------------------------|--------------------------------------------------------------------------------------------------------------------------------------------------------------------------------------------------------------------------------------------------------------------------------------------------------------------------------------------------------------------------------------------|----------------------------------------------|-----|---------|-----|
| 7  | 8.03      | [M + H] <sup>+</sup> | C <sub>25</sub> H <sub>25</sub> O <sub>13</sub> | 533.127<br>1  | 533.1290 | -3.54 | 285.07642(C <sub>16</sub> H <sub>13</sub> O <sub>5</sub> );                                                                                                                              | [533-285]270.05258(C <sub>15</sub> H <sub>10</sub> O <sub>5</sub> );<br>253.04982(C <sub>15</sub> H <sub>9</sub> O <sub>4</sub> );<br>225.05478(C <sub>14</sub> H <sub>9</sub> O <sub>3</sub> );<br>137.02333(C <sub>7</sub> H <sub>5</sub> O <sub>3</sub> );                                                                                                                              | Calycosin-7-O-β-D-glucoside 4''-O-malonate   | +++ | ++<br>+ | +++ |
| 8  | 8.95      | [M + H] <sup>+</sup> | C <sub>21</sub> H <sub>21</sub> O <sub>10</sub> | 433.112<br>0  | 433.1129 | -2.11 | 255.06516(C <sub>15</sub> H <sub>11</sub> O <sub>4</sub> )                                                                                                                               |                                                                                                                                                                                                                                                                                                                                                                                            | genistin                                     | ++  | ++<br>+ | +++ |
| 9  | 9.31      | [M + H] <sup>+</sup> | C <sub>24</sub> H <sub>23</sub> O <sub>13</sub> | 519.111<br>6  | 519.1133 | -3.25 | 433.11377(C <sub>21</sub> H <sub>21</sub> O <sub>10</sub> );<br><b>271.06073(C<sub>15</sub>H<sub>11</sub>O<sub>5</sub>);</b>                                                             | [519-271]253.04958(C <sub>15</sub> H <sub>9</sub> O <sub>4</sub> );<br>243.06526(C <sub>14</sub> H <sub>11</sub> O <sub>4</sub> );<br><b>215.07045(C<sub>13</sub>H<sub>11</sub>O<sub>3</sub>);</b><br>153.01833(C <sub>7</sub> H <sub>5</sub> O <sub>4</sub> );<br>149.02333(C <sub>8</sub> H <sub>5</sub> O <sub>3</sub> );                                                               | Genistein-glucoside malonate                 | -   | ++<br>+ | +++ |
| 10 | 9.64      | [M + H] <sup>+</sup> | C <sub>22</sub> H <sub>21</sub> O <sub>10</sub> | 445.111<br>2  | 445.1129 | -3.98 | <b>283.06073(C<sub>16</sub>H<sub>11</sub>O<sub>5</sub>);</b><br>253.04929(C <sub>15</sub> H <sub>9</sub> O <sub>4</sub> );<br>225.05496(C <sub>14</sub> H <sub>9</sub> O <sub>3</sub> ); |                                                                                                                                                                                                                                                                                                                                                                                            | Pseudobaptigenin 7-O-β-D-glucoside           | +++ | ++<br>+ | +++ |
| 11 | 10.1<br>9 | [M + H] <sup>+</sup> | C <sub>22</sub> H <sub>23</sub> O <sub>9</sub>  | 431.132<br>3  | 431.1336 | -3.18 | <b>269.08151(C<sub>16</sub>H<sub>13</sub>O<sub>4</sub>);</b><br>254.05960(C <sub>15</sub> H <sub>10</sub> O <sub>4</sub> );                                                              | [431-269] <b>254.05771(C<sub>15</sub>H<sub>10</sub>O<sub>4</sub>);</b><br>213.09125(C <sub>14</sub> H <sub>13</sub> O <sub>2</sub> );<br>137.02341(C <sub>7</sub> H <sub>5</sub> O <sub>3</sub> );<br>136.01564(C <sub>7</sub> H <sub>4</sub> O <sub>3</sub> );                                                                                                                            | Ononin                                       | +   | ++<br>+ | +++ |
| 12 | 10.5      | [M + H] <sup>+</sup> | C <sub>25</sub> H <sub>25</sub> O <sub>14</sub> | 549.122<br>5  | 549.1239 | -2.52 | 463.12491(C <sub>22</sub> H <sub>23</sub> O <sub>11</sub> );<br><b>301.07153(C<sub>16</sub>H<sub>13</sub>O<sub>6</sub>);</b>                                                             | <b>[549-301]286.04773(C<sub>15</sub>H<sub>10</sub>O<sub>6</sub>);</b><br>269.04495(C <sub>15</sub> H <sub>9</sub> O <sub>5</sub> );<br>245.08113(C <sub>14</sub> H <sub>13</sub> O <sub>4</sub> );<br>241.04996(C <sub>14</sub> H <sub>9</sub> O <sub>4</sub> );<br>153.01846(C <sub>7</sub> H <sub>5</sub> O <sub>4</sub> );<br>149.02351(C <sub>8</sub> H <sub>5</sub> O <sub>3</sub> ); | Trihydroxy-methoxyflavone-glucoside-malonate | -   | ++<br>+ | +++ |
| 13 | 11.0<br>2 | [M - H] <sup>-</sup> | C <sub>7</sub> H <sub>5</sub> O <sub>3</sub>    | 137.024<br>03 | 137.0233 | 5.18  |                                                                                                                                                                                          |                                                                                                                                                                                                                                                                                                                                                                                            | Salicylic acid                               | +++ | ++<br>+ | +++ |

|    |           |                         |                                                 |         |          |       |                                                             |                                                             |                                                                      |                                                             |     |                     |     |
|----|-----------|-------------------------|-------------------------------------------------|---------|----------|-------|-------------------------------------------------------------|-------------------------------------------------------------|----------------------------------------------------------------------|-------------------------------------------------------------|-----|---------------------|-----|
| 14 | 11.4<br>7 | [M +<br>H] <sup>+</sup> | C <sub>15</sub> H <sub>11</sub> O <sub>4</sub>  | 255.064 | 255.0652 | -4.65 | 237.05475(C <sub>15</sub> H <sub>9</sub> O <sub>3</sub> );  | 199.07558(C <sub>13</sub> H <sub>11</sub> O <sub>2</sub> ); | Daidzein                                                             | +                                                           | ++  | +++                 |     |
|    |           |                         |                                                 | 0       |          |       | 209.05980(C <sub>14</sub> H <sub>9</sub> O <sub>2</sub> );  |                                                             |                                                                      |                                                             | +   |                     |     |
| 15 | 12.1<br>6 | [M +<br>H] <sup>+</sup> | C <sub>25</sub> H <sub>23</sub> O <sub>13</sub> | 531.111 | 531.1133 | -3.29 | 227.07045(C <sub>14</sub> H <sub>11</sub> O <sub>3</sub> ); | 283.06085(C <sub>16</sub> H <sub>11</sub> O <sub>5</sub> ); | [531-283]253.04999(C <sub>15</sub> H <sub>9</sub> O <sub>4</sub> );  | Pseudobaptigenin                                            | +++ | ++                  | ++  |
|    |           |                         |                                                 | 6       |          |       | 225.05502(C <sub>14</sub> H <sub>9</sub> O <sub>3</sub> );  |                                                             | 226.06264(C <sub>14</sub> H <sub>10</sub> O <sub>3</sub> );          | 197.05977(C <sub>13</sub> H <sub>9</sub> O <sub>2</sub> );  |     | 7-O-β-glucoside     |     |
| 16 | 12.2<br>8 | [M +<br>H] <sup>+</sup> | C <sub>22</sub> H <sub>21</sub> O <sub>11</sub> | 461.106 | 461.1078 | -2.36 | 209.05980(C <sub>14</sub> H <sub>9</sub> O <sub>2</sub> );  | 299.05402(C <sub>16</sub> H <sub>11</sub> O <sub>6</sub> ); | [461-299]269.04468(C <sub>15</sub> H <sub>9</sub> O <sub>5</sub> );  | Deirisin                                                    | -   | ++                  | +++ |
|    |           |                         |                                                 | 8       |          |       | 241.04973(C <sub>14</sub> H <sub>9</sub> O <sub>4</sub> );  |                                                             | 225.05496(C <sub>14</sub> H <sub>9</sub> O <sub>3</sub> );           | 181.01332(C <sub>8</sub> H <sub>5</sub> O <sub>5</sub> );   |     | -4'-O-β-D-glucoside |     |
| 17 | 12.6<br>5 | [M +<br>H] <sup>+</sup> | C <sub>25</sub> H <sub>25</sub> O <sub>12</sub> | 517.132 | 517.1340 | -3.93 | 137.02345(C <sub>7</sub> H <sub>5</sub> O <sub>3</sub> );   | 269.08173(C <sub>16</sub> H <sub>13</sub> O <sub>4</sub> ); | [517-269]254.05789(C <sub>15</sub> H <sub>10</sub> O <sub>4</sub> ); | Formononetin 7-O-                                           | +   | ++                  | +++ |
|    |           |                         |                                                 | 0       |          |       | 237.05495(C <sub>15</sub> H <sub>9</sub> O <sub>3</sub> );  |                                                             | 226.06264(C <sub>14</sub> H <sub>10</sub> O <sub>3</sub> );          | 213.09138(C <sub>14</sub> H <sub>13</sub> O <sub>2</sub> ); |     | β-D-glucoside -O-   |     |
| 18 | 13.7<br>6 | [M +<br>H] <sup>+</sup> | C <sub>22</sub> H <sub>23</sub> O <sub>10</sub> | 447.127 | 447.1286 | -3.27 | 137.02356(C <sub>7</sub> H <sub>5</sub> O <sub>3</sub> );   | 285.07651(C <sub>16</sub> H <sub>13</sub> O <sub>5</sub> ); | [447-285]270.05261(C <sub>15</sub> H <sub>10</sub> O <sub>5</sub> ); | Biochanin A-β-D-                                            | +++ | ++                  | +++ |
|    |           |                         |                                                 | 1       |          |       | 229.08620(C <sub>14</sub> H <sub>13</sub> O <sub>3</sub> ); |                                                             | 152.01059(C <sub>7</sub> H <sub>4</sub> O <sub>4</sub> );            | glucoside                                                   |     | +                   |     |
| 19 | 14.3      | [M +<br>H] <sup>+</sup> | C <sub>22</sub> H <sub>23</sub> O <sub>10</sub> | 447.127 | 447.1286 | -3.56 | 229.08606(C <sub>14</sub> H <sub>13</sub> O <sub>3</sub> ); | 285.07626(C <sub>16</sub> H <sub>13</sub> O <sub>5</sub> ); | [447-285]257.08096(C <sub>15</sub> H <sub>13</sub> O <sub>4</sub> ); | Prunetin                                                    | +++ | ++                  | +++ |
|    |           |                         |                                                 | 0       |          |       | 167.03397(C <sub>8</sub> H <sub>7</sub> O <sub>4</sub> );   |                                                             | 175.03906(C <sub>10</sub> H <sub>7</sub> O <sub>3</sub> );           | -4'-O-β-D-glucoside                                         |     | +                   |     |

|    |      |                      |                                                 |               |          |       |                                                                                                                                                                                                                                                                                                                      |                                                                                                                                                                                                                                                                                                                                                                                                                                                         |                                                    |         |         |     |
|----|------|----------------------|-------------------------------------------------|---------------|----------|-------|----------------------------------------------------------------------------------------------------------------------------------------------------------------------------------------------------------------------------------------------------------------------------------------------------------------------|---------------------------------------------------------------------------------------------------------------------------------------------------------------------------------------------------------------------------------------------------------------------------------------------------------------------------------------------------------------------------------------------------------------------------------------------------------|----------------------------------------------------|---------|---------|-----|
| 20 | 14.6 | [M + H] <sup>+</sup> | C <sub>25</sub> H <sub>23</sub> O <sub>14</sub> | 547.106<br>3  | 547.1082 | -3.49 | <b>299.05591(C<sub>16</sub>H<sub>11</sub>O<sub>6</sub>);</b>                                                                                                                                                                                                                                                         | 151.03908(C <sub>8</sub> H <sub>7</sub> O <sub>3</sub> );<br><b>123.04417(C<sub>7</sub>H<sub>7</sub>O<sub>2</sub>);</b><br><b>[547-299]269.04462(C<sub>15</sub>H<sub>9</sub>O<sub>5</sub>);</b><br>243.06537(C <sub>14</sub> H <sub>11</sub> O <sub>4</sub> );<br>241.04973(C <sub>14</sub> H <sub>9</sub> O <sub>4</sub> );<br>225.05486(C <sub>14</sub> H <sub>9</sub> O <sub>3</sub> );<br>181.01329(C <sub>8</sub> H <sub>5</sub> O <sub>5</sub> ); | Deirisin<br>-4'-O-β-D-<br>glucoside<br>-O-malonate | +       | ++<br>+ | +++ |
| 21 | 15.8 | [M + H] <sup>+</sup> | C <sub>15</sub> H <sub>11</sub> O <sub>5</sub>  | 271.059<br>2  | 271.0601 | -3.32 | 253.04976(C <sub>15</sub> H <sub>9</sub> O <sub>4</sub> );<br>243.06548(C <sub>14</sub> H <sub>11</sub> O <sub>4</sub> );<br>215.07062(C <sub>13</sub> H <sub>11</sub> O <sub>3</sub> );<br><b>153.01849(C<sub>7</sub>H<sub>5</sub>O<sub>4</sub>);</b>                                                               | Genistein                                                                                                                                                                                                                                                                                                                                                                                                                                               | -                                                  | ++<br>+ | +++     |     |
| 22 | 15.8 | [M + H] <sup>+</sup> | C <sub>25</sub> H <sub>25</sub> O <sub>13</sub> | 533.126<br>5  | 533.1290 | -4.70 | 447.13031(C <sub>22</sub> H <sub>23</sub> O <sub>10</sub> );<br><b>285.07681(C<sub>16</sub>H<sub>13</sub>O<sub>5</sub>);</b>                                                                                                                                                                                         | Biochanin A-β-D-<br>glucoside-O-<br>malonate                                                                                                                                                                                                                                                                                                                                                                                                            | +++                                                | ++<br>+ | +++     |     |
| 23 | 16.3 | [M + H] <sup>+</sup> | C <sub>25</sub> H <sub>25</sub> O <sub>13</sub> | 533.127<br>44 | 533.1290 | -2.87 | <b>285.0749(C<sub>16</sub>H<sub>13</sub>O<sub>5</sub>);</b><br><b>286.04752(C<sub>15</sub>H<sub>10</sub>O<sub>6</sub>);</b><br>269.04486(C <sub>15</sub> H <sub>9</sub> O <sub>5</sub> );<br>241.05003(C <sub>14</sub> H <sub>9</sub> O <sub>4</sub> );<br>153.01851(C <sub>7</sub> H <sub>5</sub> O <sub>4</sub> ); | Biochanin A-β-D-<br>glucoside-O-<br>malonate isomer                                                                                                                                                                                                                                                                                                                                                                                                     | +++                                                | ++<br>+ | +++     |     |
| 24 | 16.9 | [M + H] <sup>+</sup> | C <sub>16</sub> H <sub>13</sub> O <sub>6</sub>  | 301.069<br>2  | 301.0707 | -4.83 | 269.04486(C <sub>15</sub> H <sub>9</sub> O <sub>5</sub> );<br>241.05003(C <sub>14</sub> H <sub>9</sub> O <sub>4</sub> );<br>153.01851(C <sub>7</sub> H <sub>5</sub> O <sub>4</sub> );                                                                                                                                | Pratensein                                                                                                                                                                                                                                                                                                                                                                                                                                              | -                                                  | ++<br>+ | +++     |     |

|    |      |                                                           |                                                |         |          |       |                                                              |                  |   |    |     |
|----|------|-----------------------------------------------------------|------------------------------------------------|---------|----------|-------|--------------------------------------------------------------|------------------|---|----|-----|
| 25 | 18.7 | [M + H] <sup>+</sup>                                      | C <sub>16</sub> H <sub>11</sub> O <sub>5</sub> | 283.058 | 283.0601 | -4.66 | <b>253.04979(C<sub>15</sub>H<sub>9</sub>O<sub>4</sub>);</b>  | Pseudobaptigenin | - | ++ | +++ |
|    |      |                                                           |                                                | 8       |          |       | 225.05496(C <sub>14</sub> H <sub>9</sub> O <sub>3</sub> );   |                  |   | +  |     |
|    |      |                                                           |                                                |         |          |       | 197.05974(C <sub>13</sub> H <sub>9</sub> O <sub>2</sub> );   |                  |   |    |     |
|    |      |                                                           |                                                |         |          |       | 183.04405(C <sub>12</sub> H <sub>7</sub> O <sub>2</sub> );   |                  |   |    |     |
| 26 | 19.2 | [M + H] <sup>+</sup>                                      | C <sub>16</sub> H <sub>13</sub> O <sub>4</sub> | 269.080 | 269.0808 | -3.25 | <b>254.05817(C<sub>15</sub>H<sub>10</sub>O<sub>4</sub>);</b> | Formononetin     | + | ++ | +++ |
|    |      |                                                           |                                                | 0       |          |       | 241.08643(C <sub>15</sub> H <sub>13</sub> O <sub>3</sub> );  |                  |   | +  |     |
|    |      |                                                           |                                                |         |          |       | 237.05533(C <sub>15</sub> H <sub>9</sub> O <sub>3</sub> );   |                  |   |    |     |
|    |      |                                                           |                                                |         |          |       | 213.09163(C <sub>14</sub> H <sub>13</sub> O <sub>2</sub> );  |                  |   |    |     |
| 27 | 21.9 | [M + H] <sup>+</sup>                                      | C <sub>16</sub> H <sub>11</sub> O <sub>6</sub> | 299.053 | 299.0550 | -4.56 | <b>269.04492(C<sub>15</sub>H<sub>9</sub>O<sub>5</sub>);</b>  | Irilone          | + | ++ | +++ |
|    |      |                                                           |                                                | 7       |          |       | 243.06557(C <sub>14</sub> H <sub>11</sub> O <sub>4</sub> );  |                  |   | +  |     |
|    |      |                                                           |                                                |         |          |       | 241.04990(C <sub>14</sub> H <sub>9</sub> O <sub>4</sub> );   |                  |   |    |     |
|    |      |                                                           |                                                |         |          |       | 225.05492(C <sub>14</sub> H <sub>9</sub> O <sub>3</sub> );   |                  |   |    |     |
| 28 | 24.7 | [M + H] <sup>+</sup>                                      | C <sub>16</sub> H <sub>13</sub> O <sub>5</sub> | 285.074 | 285.0758 | -3.23 | <b>270.05292(C<sub>15</sub>H<sub>10</sub>O<sub>5</sub>);</b> | Biochanin A      | - | ++ | +++ |
|    |      |                                                           |                                                | 8       |          |       | 257.08127(C <sub>15</sub> H <sub>13</sub> O <sub>4</sub> );  |                  |   | +  |     |
|    |      |                                                           |                                                |         |          |       | 253.05009(C <sub>15</sub> H <sub>9</sub> O <sub>4</sub> );   |                  |   |    |     |
|    |      |                                                           |                                                |         |          |       | 229.08647(C <sub>14</sub> H <sub>13</sub> O <sub>3</sub> );  |                  |   |    |     |
|    |      | 153.01862(C <sub>7</sub> H <sub>5</sub> O <sub>4</sub> ); |                                                |         |          |       |                                                              |                  |   |    |     |
|    |      | 152.01076(C <sub>7</sub> H <sub>4</sub> O <sub>4</sub> ); |                                                |         |          |       |                                                              |                  |   |    |     |
|    |      | 149.02357(C <sub>8</sub> H <sub>5</sub> O <sub>3</sub> ); |                                                |         |          |       |                                                              |                  |   |    |     |
|    |      | 123.04431(C <sub>7</sub> H <sub>7</sub> O <sub>2</sub> ); |                                                |         |          |       |                                                              |                  |   |    |     |

Bold characters: the base peaks in MS<sup>n</sup> spectra; -: means not detected. +++: the response value of the sample is 80–100% of the maximum; ++: the response value of the sample is 40–80% of the maximum; +: the response value of the sample is within 40% of the maximum.

## 2. Blood-absorbed components analysis for the validation of the quality control markers

Generally, traditional herbal medicine is administered orally, so the components that are absorbed into blood take effect. Therefore, the nine potential quality control markers screened by network pharmacology were further confirmed in the plasma by UPLC-MS.

The nine potential quality control markers screened by network pharmacology were extracted by exact mass search in the plasma, using the high accuracy of  $m/z$  determined by UPLC-MS. All the nine compounds were successfully found and conformed as shown in Table S1. The identification was confirmed by comparing their UPLC retention times and MS data with the authentic commercial standards.

**Table 2.** Blood-absorbed components analysis for the validation of the quality control markers.

| No. | RT min | Ion Form             | molecular Formula                               | MS <sup>1</sup> |                 |         | Identification              |
|-----|--------|----------------------|-------------------------------------------------|-----------------|-----------------|---------|-----------------------------|
|     |        |                      |                                                 | Measured $m/z$  | Predicted $m/z$ | Err ppm |                             |
| 1   | 10.06  | [M + H] <sup>+</sup> | C <sub>22</sub> H <sub>22</sub> O <sub>9</sub>  | 431.1329        | 431.1336        | -1.69   | ononin                      |
| 2   | 11.22  | [M + H] <sup>+</sup> | C <sub>15</sub> H <sub>10</sub> O <sub>4</sub>  | 255.0638        | 255.0652        | -5.51   | daidzein                    |
| 3   | 5.22   | [M + H] <sup>+</sup> | C <sub>16</sub> H <sub>18</sub> O <sub>9</sub>  | 355.1011        | 355.1024        | -3.56   | chlorogenic acid            |
| 4   | 6.53   | [M + H] <sup>+</sup> | C <sub>21</sub> H <sub>20</sub> O <sub>9</sub>  | 417.1162        | 417.1180        | -4.38   | daidzin                     |
| 5   | 7.01   | [M + H] <sup>+</sup> | C <sub>22</sub> H <sub>22</sub> O <sub>10</sub> | 447.1266        | 447.1286        | -4.41   | calycosin-7-O-β-D-glucoside |
| 6   | 15.51  | [M + H] <sup>+</sup> | C <sub>15</sub> H <sub>10</sub> O <sub>5</sub>  | 271.0585        | 271.0601        | -5.79   | Genistein                   |
| 7   | 19.00  | [M + H] <sup>+</sup> | C <sub>16</sub> H <sub>12</sub> O <sub>4</sub>  | 269.0793        | 269.0808        | -5.78   | Formononetin                |
| 8   | 8.75   | [M + H] <sup>+</sup> | C <sub>21</sub> H <sub>20</sub> O <sub>10</sub> | 433.1109        | 433.1129        | -4.51   | genistin                    |
| 9   | 24.47  | [M + H] <sup>+</sup> | C <sub>16</sub> H <sub>12</sub> O <sub>5</sub>  | 285.0738        | 285.0758        | -6.77   | Biochanin A                 |

### 3 The results of correlation analysis for the contents of nine compounds and the total contents

Table S3. The results of correlation analysis

|                                     |                            | Chlorogenic Acid | Daidzin | Calycosin-7-O- $\beta$ -D-glucoside | Genistin | Ononin  | Daidzein | Genistein | Formononetin | Biochanin A | Total Content |
|-------------------------------------|----------------------------|------------------|---------|-------------------------------------|----------|---------|----------|-----------|--------------|-------------|---------------|
| Chlorogenic acid                    | Pearson correlation        | 1                | 0.017   | 0.735**                             | 0.344    | 0.497   | -0.485   | 0.122     | 0.025        | 0.227       | 0.486         |
|                                     | <i>P</i> value (bilateral) |                  | 0.958   | 0.006                               | 0.273    | 0.100   | 0.110    | 0.706     | 0.938        | 0.478       | 0.109         |
|                                     | <i>N</i>                   | 12               | 12      | 12                                  | 12       | 12      | 12       | 12        | 12           | 12          | 12            |
| Daidzin                             | Pearson correlation        | 0.017            | 1       | 0.191                               | 0.588*   | 0.379   | 0.407    | 0.414     | -0.019       | 0.122       | 0.439         |
|                                     | <i>p</i> value (bilateral) | 0.958            |         | 0.495                               | 0.021    | 0.164   | 0.132    | 0.125     | 0.947        | 0.665       | 0.102         |
|                                     | <i>N</i>                   | 12               | 15      | 15                                  | 15       | 15      | 15       | 15        | 15           | 15          | 15            |
| calycosin-7-O- $\beta$ -D-glucoside | Pearson correlation        | 0.735**          | 0.191   | 1                                   | 0.358    | 0.534*  | -0.242   | -0.094    | 0.082        | 0.119       | 0.532*        |
|                                     | <i>p</i> value (bilateral) | 0.006            | 0.495   |                                     | 0.190    | 0.040   | 0.384    | 0.740     | 0.772        | 0.673       | 0.041         |
|                                     | <i>N</i>                   | 12               | 15      | 15                                  | 15       | 15      | 15       | 15        | 15           | 15          | 15            |
| Genistin                            | Pearson correlation        | 0.344            | 0.588*  | 0.358                               | 1        | 0.895** | -0.353   | 0.464     | -0.031       | 0.446       | 0.793**       |
|                                     | <i>p</i> value (bilateral) | 0.273            | 0.021   | 0.190                               |          | 0.000   | 0.197    | 0.081     | 0.912        | 0.096       | .000          |
|                                     | <i>N</i>                   | 12               | 15      | 15                                  | 15       | 15      | 15       | 15        | 15           | 15          | 15            |
| Ononin                              | Pearson correlation        | 0.497            | 0.379   | 0.534*                              | 0.895**  | 1       | -0.494   | 0.314     | 0.129        | 0.368       | 0.849**       |

|               |                               |        |        |        |         |         |        |         |        |         |         |
|---------------|-------------------------------|--------|--------|--------|---------|---------|--------|---------|--------|---------|---------|
|               | <i>p</i> value<br>(bilateral) | 0.100  | 0.164  | 0.040  | 0.000   |         | 0.061  | 0.254   | 0.647  | 0.178   | 0.000   |
|               | <i>N</i>                      | 12     | 15     | 15     | 15      | 15      | 15     | 15      | 15     | 15      | 15      |
| Daidzein      | Pearson<br>correlation        | -0.485 | 0.407  | -0.242 | -0.353  | -0.494  | 1      | 0.267   | 0.250  | -0.024  | -0.186  |
|               | <i>p</i> value<br>(bilateral) | 0.110  | 0.132  | 0.384  | 0.197   | 0.061   |        | 0.337   | 0.369  | 0.933   | 0.507   |
|               | <i>N</i>                      | 12     | 15     | 15     | 15      | 15      | 15     | 15      | 15     | 15      | 15      |
| Genistein     | Pearson<br>correlation        | 0.122  | 0.414  | -0.094 | 0.464   | 0.314   | 0.267  | 1       | 0.540* | 0.762** | 0.637*  |
|               | <i>p</i> value<br>(bilateral) | 0.706  | 0.125  | 0.740  | 0.081   | 0.254   | 0.337  |         | 0.038  | 0.001   | 0.011   |
|               | <i>N</i>                      | 12     | 15     | 15     | 15      | 15      | 15     | 15      | 15     | 15      | 15      |
| Formononetin  | Pearson<br>correlation        | 0.025  | -0.019 | 0.082  | -0.031  | 0.129   | 0.250  | 0.540*  | 1      | 0.634*  | 0.534*  |
|               | <i>p</i> value<br>(bilateral) | 0.938  | 0.947  | 0.772  | 0.912   | 0.647   | 0.369  | 0.038   |        | 0.011   | 0.041   |
|               | <i>N</i>                      | 12     | 15     | 15     | 15      | 15      | 15     | 15      | 15     | 15      | 15      |
| Biochanin A   | Pearson<br>correlation        | 0.227  | 0.122  | 0.119  | 0.446   | 0.368   | -0.024 | 0.762** | 0.634* | 1       | 0.735** |
|               | <i>p</i> value<br>(bilateral) | 0.478  | 0.665  | 0.673  | 0.096   | 0.178   | 0.933  | 0.001   | 0.011  |         | 0.002   |
|               | <i>N</i>                      | 12     | 15     | 15     | 15      | 15      | 15     | 15      | 15     | 15      | 15      |
| Total content | Pearson<br>correlation        | 0.486  | 0.439  | 0.532* | 0.793** | 0.849** | -0.186 | 0.637*  | 0.534* | 0.735** | 1       |
|               | <i>p</i> value<br>(bilateral) | 0.109  | 0.102  | 0.041  | 0.000   | 0.000   | 0.507  | 0.011   | 0.041  | 0.002   |         |
|               | <i>N</i>                      | 12     | 15     | 15     | 15      | 15      | 15     | 15      | 15     | 15      | 15      |



---

**\*\*.**  $p < 0.01$ ; **\***.  $p < 0.05$

---
